# Supplementary material
Source: publisher site journal article supplement (https://www.dovepress.com/article/379414)
Supplement: Supplementary file 1 [file get_supplementary_file.php]

Supplementary Material

**
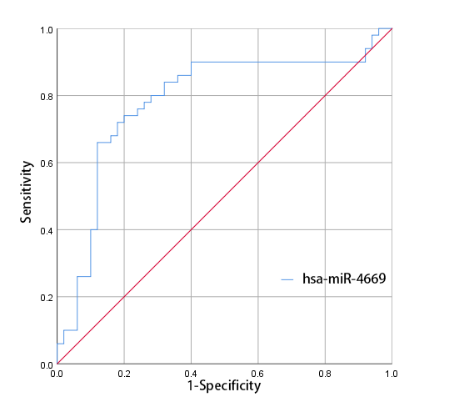
**

**Supplementary Figure 1.** ROC curve of has-miR-4669 for the efficacy of SCIT among pediatric AR patient
